# Supplementary material for: Group size and composition influence collective movement in a highly social terrestrial bird
Source: eLife. 2020 Nov 10;9:e59902. doi: 10.7554/eLife.59902 (PMC7655099; doi:10.7554/eLife.59902)
Supplement: Supplementary file 1. — (A) includes the summary data for each group across the five study seasons. (B-F) present all GEEs fitted. Those with the lowest QIC, for each response variable, are also presented in the main text. [file elife-59902-supp1.xlsx]

## Sheet:  Supplementary file 1A
Group	Metal Ring	Number of Adults	Number of Chicks	Season	Home Range Size (km2)	Daily Travelled Distance (m)	Averaged Daily Auto-Overlap	Speed ‘on the go’ (m/s)	Number of GPS fixes	Number of days tracked
1	W1850	51.4615	0	A	1.22583	11.2735	0.825289	0.220941	505892	63
1	W1850	43	0	B	4.82903	7.35981	0.543586	0.207999	187767	62
1	W1850	23.8889	18.3333	C	2.0682	7.28825	0.794657	0.201726	230642	60
1	W1850	21	11	E	0.595392	8.05631	0.957078	0.184012	390668	61
2	W1255	32	0	B	3.81886	3.84006	0.500186	0.184385	63365	16
3	W1259	32.125	22.75	C	1.12937	7.66104	0.835137	0.185817	323212	50
3	W1259	46	0	D	1.03659	9.10489	0.895259	0.204103	386839	61
4	W1436	49	0	D	2.1857	9.7257	0.862851	0.224093	332308	61
4	W1436	58	9	E	2.0298	10.3479	0.906037	0.192017	336383	61
5	W1281	55	0	A	2.50055	11.329	0.85383	0.224959	582081	43
5	W1281	24.7143	7.5	C	2.65896	7.46751	0.779984	0.192339	241970	60
5	W1281	32	5	E	1.53815	8.81858	0.823789	0.197407	221836	61
6	W1301	22.8462	0	A	1.08854	13.5497	0.747669	0.225752	387328	63
7	W1308	26	7	B	1.17469	8.32177	0.82943	0.164743	793997	62
7	W1308	24	21	C	0.871563	8.0864	0.787861	0.176029	592420	60
7	W1302	14	3	E	0.803626	6.58077	0.906631	0.166041	497709	61
8	W1319	46	0	A	2.19427	10.7415	0.90215	0.211706	565895	63
8	W1319	37.25	13.5	C	1.05416	6.95862	0.821365	0.247163	64447	60
8	W1319	47	3	E	0.511777	6.95062	0.871956	0.225494	90587	61
9	W1333	53	0	A	2.79816	13.1714	0.764005	0.226564	380817	63
9	W1333	38.5	5	B	6.35951	7.53849	0.642876	0.216938	212102	62
9	W1333	38	9.66667	C	4.03607	7.27084	0.699514	0.192945	332582	60
10	W1346	27.7143	12	C	0.67994	7.87867	0.845994	0.183469	484594	60
10	W1404	61	0	D	0.566866	8.64171	0.863503	0.272977	134129	60
11	W1429	28	8	B	1.51516	7.79744	0.771773	0.18433	807009	62
11	W1429	28.75	17.5	C	0.86379	7.955	0.794106	0.20114	364601	60
11	W1700	27.5	4.5	E	0.975819	8.19113	0.921207	0.169815	719429	61
12	W1446	23	4.33333	C	2.61116	7.62044	0.767535	0.17146	461135	60
12	W1446	35	0	D	1.07958	9.3678	0.851106	0.229093	278490	60
12	W1501	27	7	E	2.87601	6.47733	0.84759	0.266506	92528	61
13	W1502	25.5	9.875	C	2.48475	8.71044	0.876616	0.178087	569679	60
13	W1502	44.5	0	D	1.12593	11.3005	0.7749	0.275923	215564	61
14	W1517	52	3	B	3.12536	8.64618	0.630965	0.181237	825364	62
15	W1741	34.6667	16.3333	C	2.89041	7.27347	0.834388	0.176121	785063	60
15	W1741	13	5	E	0.708922	5.59941	0.797637	0.15196	643951	61
16	W1788	32.3333	27.4	C	0.593862	7.53853	0.84399	0.185521	613008	60
16	W1694	53.5	0	D	0.65971	10.3211	0.880177	0.208557	367026	60
16	W1694	53.5	0	E	0.402938	8.24217	0.946113	0.184574	306552	61
17	W1351	61	0	D	0.814041	9.29331	0.802103	0.276343	114254	60
18	W1396	55	0	D	1.2341	9.13938	0.923048	0.23052	219451	61
18	W1396	23	2	E	1.51235	8.57379	0.899869	0.172999	318949	61
19	W1910	19	5	E	1.91733	6.7839	0.83769	0.17723	369594	61
20	W1948	27	5	E	2.72174	7.97149	0.76271	0.297859	45566	61
21	W1512	60	0	D	1.54031	10.1996	0.893871	0.185996	1058730	60
21	W1512	40.5	13.5	E	0.831419	9.75498	0.831549	0.163724	762816	61

## Sheet: Supplementary file 1B
Response Variable	Model ID	Independent Variables	Estimate	Standard Error	﻿Wald	P	R2	QIC
Home Range	m1	Intercept	-1.49653	1.16341	1.65465	0.198328	0.161	62.3
		Number of Adults	0.221966	0.0809885	7.51152	0.00613057
		Number of Adults2	-0.00299175	0.00107606	7.72994	0.00543125
		Number of Chicks	-0.0479279	0.0231327	4.29265	0.0382774
	m2	Intercept	2.09459	0.526534	15.825	<0.001	0.01856	72.2
		Number of Adults	-0.00406468	0.0114176	0.126737	0.721839
		Number of Chicks	-0.0262108	0.0203283	1.66248	0.197268
	m3	Intercept	1.71811	0.389342	19.4733	<0.001	<0.001	72.3
		Number of Adults	0.00175467	0.0100479	0.0304957	0.86137
	m4	Intercept	-1.49084	1.20488	1.531	0.215962	0.1052	64.8
		Number of Adults	0.191553	0.0764081	6.28494	0.0121768
		Number of Adults2	-0.00245971	0.000976267	6.34792	0.0117519
	Testing Interactions
	m17	Intercept	-1.77758	1.24644	2.03383	0.153832	0.1455	63.7
		Number of Adults	0.228442	0.0851979	7.18941	0.0073335
		Number of Adults2	-0.00300744	0.00112103	7.19713	0.00730202
		Number of Adults:Number of Chicks	-0.00122217	0.000769932	2.51975	0.112428
	m18	Intercept	-1.36987	1.11995	1.49612	0.221269	0.187	60
		Number of Adults	0.224363	0.0800329	7.85898	0.00505689
		Number of Adults2	-0.00312051	0.00107516	8.42367	0.00370368
		Number of Adults:Number of Chicks	-0.00566949	0.00201629	7.90649	0.00492578
		Number of Adults2:Number of Chicks	0.000122485	4.9335e-05	6.16391	0.0130383
	m19	Intercept	-1.75622	1.27433	1.8993	0.168157	0.1244	63.8
		Number of Adults	0.216848	0.0847243	6.5508	0.0104837
		Number of Adults2	-0.00280354	0.00110054	6.48937	0.0108521
		Number of Adults2:Number of Chicks	-2.24002e-05	2.28041e-05	0.96489	0.325958
	m20	Intercept	-0.827013	1.10575	0.55939	0.454506	0.1747	62.6
		Number of Adults	0.193861	0.0756458	6.56763	0.010385
		Number of Adults2	-0.00273173	0.00100306	7.41695	0.00646123
		Number of Chicks	-0.141626	0.0858141	2.72377	0.098864
		Number of Adults:Number of Chicks	0.00290109	0.00260216	1.24295	0.264903
	m21	Intercept	-2.08799	1.50026	1.93699	0.163996	0.1912	60.4
		Number of Adults	0.260205	0.0949449	7.5108	0.00613301
		Number of Adults2	-0.00353781	0.00122298	8.36817	0.0038185
		Number of Chicks	0.16188	0.212742	0.579006	0.446702
		Number of Adults:Number of Chicks	-0.0144009	0.0111512	1.66776	0.196559
		Number of Adults2:Number of Chicks	0.000233159	0.000132202	3.1105	0.0777892
	m22	Intercept	-0.963039	1.05603	0.831639	0.361799	0.1801	60.7
		Number of Adults	0.202189	0.0750669	7.25469	0.00707162
		Number of Adults2	-0.00284634	0.00100907	7.95664	0.00479113
		Number of Chicks	-0.0977831	0.0405763	5.80741	0.0159587
		Number of Adults2:Number of Chicks	4.55e-05	3.04e-05	2.23647	0.134789
	m23	Intercept	1.87796	0.455296	17.0131	<0.001	0.006722	73.1
		Number of Adults	-0.000253991	0.0105685	0.000577581	0.980826
		Number of Adults:Number of Chicks	-0.000456647	0.000638588	0.511352	0.474554
	m24	Intercept	2.72794	0.688246	15.7102	<0.001	0.06457	70.5
		Number of Adults	-0.0190584	0.0141978	1.80191	0.179482
		Number of Chicks	-0.195597	0.0975931	4.01686	0.0450474
		Number of Adults:Number of Chicks	0.00514097	0.00290866	3.12395	0.0771494
	m53	Intercept	-0.25321	1.43051	0.0313314	0.859503	0.2225	61.4
		Number of Adults	0.157069	0.0726787	4.67052	0.0306846
		Number of Adults2	-0.00228536	0.000900069	6.44701	0.0111139
		Number of Chicks	-0.400568	0.373381	1.15093	0.283354
		Number of Chicks2	0.00895759	0.0114842	0.60839	0.435395
		Number of Adults:Number of Chicks	0.0135473	0.0110514	1.5027	0.220257
		Number of Adults2:Number of Chicks2	-1.27515e-05	1.1105e-05	1.31852	0.250858
	m54	Intercept	-1.61836	1.16044	1.94494	0.163133	0.2017	61.66
		Number of Adults	0.213839	0.0748253	8.16729	0.00426525
		Number of Adults2	-0.00284173	0.000983916	8.34162	0.00387471
		Number of Chicks	-0.00252105	0.105526	0.000570749	0.98094
		Number of Chicks2	-0.00421033	0.00266335	2.49906	0.113914
		Number of Adults:Number of Chicks	0.00149167	0.00233201	0.409153	0.5224
	m55	Intercept	-1.97324	1.23688	2.54511	0.110636	0.1986	61.27
		Number of Adults	0.227513	0.079322	8.22667	0.00412792
		Number of Adults2	-0.00296208	0.0010332	8.21912	0.00414514
		Number of Chicks	0.054422	0.072972	0.556208	0.455792
		Number of Chicks2	-0.00489358	0.00351045	1.94324	0.163317
		Number of Adults2:Number of Chicks2	2.88e-07	2.32e-06	0.0153796	0.901304
	m56	Intercept	-1.66044	1.20112	1.91106	0.166845	0.1903	60.29
		Number of Adults	0.225184	0.08032	7.86008	0.00505381
		Number of Adults2	-0.00301383	0.00104522	8.31417	0.0039337
		Number of Chicks2	-0.00337378	0.00253052	1.77752	0.182454
		Number of Adults2:Number of Chicks2	9.32863e-07	2.57712e-06	0.131029	0.717368
	m57	Intercept	-2.01483	1.25623	2.5724	0.108743	0.1985	61.05
		Number of Adults	0.228999	0.0799014	8.21409	0.00415664
		Number of Adults2	-0.0029736	0.0010393	8.1862	0.00422102
		Number of Chicks	0.0561418	0.0742175	0.572215	0.44938
		Number of Chicks2	-0.00468207	0.00280697	2.78227	0.0953129

## Sheet: Supplementary file 1C
Response Variable	Model ID	Independent Variables	Estimate	Standard Error	﻿Wald	P	R2	QIC
Averaged Daily Auto-overlap	m5	Intercept	1.02498	0.100023	105.011	<0.001	0.1301	5.35
		Number of Adults	-0.0146794	0.0067047	4.79356	0.0285663
		Number of Adults2	0.000205011	8.94731e-05	5.25011	0.0219453
		Number of Chicks	0.00275345	0.00203189	1.83634	0.17538
	m6	Intercept	1.02466	0.101801	101.309	<0.001	0.09788	3.58
		Number of Adults	-0.0129322	0.00600278	4.6413	0.0312114
		Number of Adults2	0.000174445	7.57711e-05	5.30043	0.0213202
	m7	Intercept	0.797075	0.0327036	594.027	<0.001	0.005758	3.71
		Number of Adults	0.000528535	0.000840567	0.395368	0.529491
	m8	Intercept	0.778901	0.0493567	249.042	<0.001	0.01317	5
		Number of Adults	0.000809453	0.000990421	0.667949	0.413767
		Number of Chicks	0.00126528	0.00171822	0.542266	0.461495
	Testing Interactions
	m26	Intercept	1.04264	0.107705	93.7118	<0.001	0.1256	5.17
		Number of Adults	-0.0152456	0.00705801	4.66577	0.0307696
		Number of Adults2	0.000208795	9.22e-05	5.12847	0.0235365
		Number of Adults:Number of Chicks	7.66e-05	5.81e-05	1.73983	0.18716
	m27	Intercept	1.03074	0.103964	98.2956	<0.001	0.1318	5.62
		Number of Adults	-0.0151266	0.00701929	4.64404	0.0311615
		Number of Adults2	0.000212094	9.43e-05	5.05893	0.0244993
		Number of Adults:Number of Chicks	0.000206397	0.000184928	1.24566	0.264383
		Number of Adults2:Number of Chicks	-3.57e-06	4.32e-06	0.683673	0.408325
	m28	Intercept	1.04481	0.109583	90.9053	<0.001	0.1173	4.36
		Number of Adults	-0.014853	0.00690871	4.62205	0.0315635
		Number of Adults2	0.000200555	8.82e-05	5.16546	0.0230403
		Number of Adults2:Number of Chicks	1.7e-06	1.4e-06	1.46935	0.225449
	m29	Intercept	1.01139	0.105725	91.5136	<0.001	0.1311	6.3
		Number of Adults	-0.0141088	0.00678884	4.31903	0.0376884
		Number of Adults2	0.000199732	8.95672e-05	4.97274	0.0257498
		Number of Chicks	0.00465585	0.00627681	0.5502	0.458236
		Number of Adults:Number of Chicks	-5.89021e-05	0.000173673	0.115026	0.734493
	m30	Intercept	1.03058	0.144784	50.6662	<0.001	0.1318	6.73
		Number of Adults	-0.0151182	0.0088093	2.94521	0.0861325
		Number of Adults2	0.000211996	0.000113168	3.5092	0.0610288
		Number of Chicks	3.79734e-05	0.0196009	3.75325e-06	0.998454
		Number of Adults:Number of Chicks	0.000204349	0.00105582	0.0374599	0.846532
		Number of Adults2:Number of Chicks	-3.54753e-06	1.35034e-05	0.0690186	0.792771
	m31	Intercept	1.01461	0.100785	101.347	<0.001	0.1314	6.64
		Number of Adults	-0.0142949	0.00665624	4.61218	0.0317456
		Number of Adults2	0.000202184	8.90122e-05	5.15935	0.0231216
		Number of Chicks	0.0037226	0.00343913	1.17165	0.279063
		Number of Adults2:Number of Chicks	-8.85076e-07	2.19832e-06	0.162099	0.687232
	m32	Intercept	0.788849	0.0430103	336.389	<0.001	0.008701	4.84
		Number of Adults	0.000631901	0.000908759	0.483505	0.486839
		Number of Adults:Number of Chicks	2.34993e-05	4.77342e-05	0.242354	0.622511
	m33	Intercept	0.751469	0.0598854	157.463	<0.001	0.02825	6.89
		Number of Adults	0.00145888	0.0011911	1.50017	0.220645
		Number of Chicks	0.00860194	0.00857941	1.00526	0.316041
		Number of Adults:Number of Chicks	-0.000222672	0.000245405	0.823309	0.364214
	m58	Intercept	0.769513	0.144839	28.2267	<0.001	0.2278	9.75
		Number of Adults	-0.00444059	0.00748453	0.352007	0.552979
		Number of Adults2	0.000107572	9.41338e-05	1.30589	0.253141
		Number of Chicks	0.0724148	0.0295762	5.99475	0.0143485
		Number of Chicks2	-0.00222973	0.000851718	6.85351	0.00884672
		Number of Adults:Number of Chicks	-0.00202645	0.000849592	5.68917	0.01707
		Number of Adults2:Number of Chicks2	2.03608e-06	7.88107e-07	6.6745	0.0097802
	m59	Intercept	0.987491	0.103958	90.2291	<0.001	0.1354	7.773
		Number of Adults	-0.0135054	0.0063945	4.46068	0.0346838
		Number of Adults2	0.00019641	8.65001e-05	5.15575	0.0231695
		Number of Chicks	0.00885698	0.0110022	0.648055	0.420809
		Number of Chicks2	-0.000127157	0.00023211	0.300117	0.583809
		Number of Adults:Number of Chicks	-0.000101468	0.000189007	0.288205	0.591373
	m60	Intercept	1.0268	0.100479	104.428	<0.001	0.1347	4.678
		Number of Adults	-0.0149778	0.00654147	5.24257	0.0220407
		Number of Adults2	0.000208797	8.87364e-05	5.53663	0.0186224
		Number of Chicks	0.00435619	0.00664962	0.42916	0.512402
		Number of Chicks2	-0.000157839	0.000196907	0.642547	0.42279
		Number of Adults2:Number of Chicks2	8.5557e-08	1.43787e-07	0.354057	0.551825
	m61	Intercept	1.05184	0.109008	93.1063	<0.001	0.1253	4.678
		Number of Adults	-0.0151642	0.00671865	5.09418	0.0240063
		Number of Adults2	0.000204655	8.60679e-05	5.6541	0.0174146
		Number of Chicks2	-3.61868e-05	0.000127642	0.0803742	0.776791
		Number of Adults2:Number of Chicks2	1.37151e-07	1.19357e-07	1.32039	0.250522
	m62	Intercept	1.01446	0.0963489	110.86	<0.001	0.1328	6.698
		Number of Adults	-0.0145366	0.00656387	4.90462	0.026785
		Number of Adults2	0.00020538	8.94868e-05	5.2674	0.0217285
		Number of Chicks	0.00486656	0.00625028	0.606239	0.436207
		Number of Chicks2	-9.5068e-05	0.000210998	0.203008	0.652304

## Sheet: Supplementary file 1D
Response Variable	Model ID	Independent Variables	Estimate	Standard Error	﻿Wald	P	R2	QIC
Averaged Daily Travelled Distance	m9	Intercept	6.4363	1.7657	13.2874	<0.001	0.2705	114
		Number of Adults	0.0735584	0.102796	0.512046	0.474255
		Number of Adults2	-0.000215368	0.0013651	0.0248906	0.87464
		Number of Chicks	-0.0452213	0.0418305	1.16869	0.279671
	m10	Intercept	6.44167	1.76056	13.3873	<0.001	0.2473	115
		Number of Adults	0.0448631	0.0957898	0.219351	0.639535
		Number of Adults2	0.000286627	0.00119236	0.0577857	0.810031
	m11	Intercept	6.06773	0.678518	79.9706	<0.001	0.2466	116
		Number of Adults	0.0669801	0.0164854	16.508	<0.001
	m12	Intercept	6.69481	1.1118	36.2595	<0.001	0.2702	114
		Number of Adults	0.0572871	0.0216009	7.03345	0.0080001
		Number of Chicks	-0.0436579	0.0378447	1.33081	0.248662
	Testing Interactions
	m35	Intercept	6.11857	1.76352	12.0376	0.000521382	0.2712	114
		Number of Adults	0.0864283	0.106545	0.65803	0.417256
		Number of Adults2	-0.000330545	0.00140069	0.0556898	0.813443
		Number of Adults:Number of Chicks	-0.00137712	0.00115021	1.43347	0.231199
	m36	Intercept	6.17572	1.83117	11.3741	0.000744739	0.2716	115
		Number of Adults	0.0858567	0.106183	0.653784	0.418763
		Number of Adults2	-0.000346393	0.00141891	0.0595976	0.807133
		Number of Adults:Number of Chicks	-0.00200047	0.00408241	0.24012	0.624119
		Number of Adults2:Number of Chicks	1.71677e-05	9.54589e-05	0.0323439	0.857275
	m37	Intercept	6.03939	1.77929	11.5211	0.000688103	0.2679	113
		Number of Adults	0.0832049	0.105663	0.620088	0.431015
		Number of Adults2	-0.00023455	0.00136404	0.0295675	0.863475
		Number of Adults2:Number of Chicks	-3.39547e-05	2.87842e-05	1.39153	0.238146
	m38	Intercept	6.20215	2.23829	7.67804	0.00558969	0.2713	116
		Number of Adults	0.0833878	0.111732	0.556994	0.455474
		Number of Adults2	-0.000306304	0.00138719	0.0487563	0.825242
		Number of Chicks	-0.0124523	0.155408	0.00642023	0.936137
		Number of Adults:Number of Chicks	-0.00101459	0.00414123	0.0600237	0.806458
	m39	Intercept	5.77683	3.22985	3.19901	0.0736827	0.2722	116
		Number of Adults	0.105765	0.15592	0.46013	0.497563
		Number of Adults2	-0.000578183	0.00183575	0.0991982	0.752794
		Number of Chicks	0.0899174	0.432272	0.0432687	0.83522
		Number of Adults:Number of Chicks	-0.00685036	0.0213023	0.103413	0.747772
		Number of Adults2:Number of Chicks	7.8642e-05	0.000257772	0.0930759	0.760303
	m40	Intercept	6.31196	1.988	10.0809	0.00149817	0.271	115
		Number of Adults	0.0781676	0.105043	0.553758	0.456786
		Number of Adults2	-0.000249258	0.00135877	0.0336517	0.85445
		Number of Chicks	-0.0336021	0.0812071	0.171216	0.679033
		Number of Adults2:Number of Chicks	-1.06112e-05	5.11896e-05	0.0429697	0.835782
	m41	Intercept	6.52035	0.929786	49.1785	<0.001	0.2704	114
		Number of Adults	0.0612926	0.0187462	10.6903	0.00107697
		Number of Adults:Number of Chicks	-0.00129298	0.00099711	1.68151	0.194724
	m42	Intercept	6.60076	1.48038	19.8811	<0.001	0.2706	116
		Number of Adults	0.0595137	0.0303187	3.85311	0.0496537
		Number of Chicks	-0.0185039	0.154368	0.0143686	0.904587
		Number of Adults:Number of Chicks	-0.000763438	0.0040107	0.0362333	0.849034
	m63	Intercept	7.67484	4.3926	3.05278	0.080599	0.2877	118.9
		Number of Adults	0.0359311	0.163858	0.0480846	0.82643
		Number of Adults2	6.72994e-05	0.00164762	0.00166843	0.967418
		Number of Chicks	-0.344154	0.887844	0.150256	0.698291
		Number of Chicks2	0.0105557	0.0250622	0.177395	0.673622
		Number of Adults:Number of Chicks	0.00604223	0.023014	0.0689301	0.792901
		Number of Adults2:Number of Chicks2	-5.87457e-06	1.99123e-05	0.0870381	0.767977
	m64	Intercept	7.04592	2.83554	6.17454	0.0129601	0.2856	117.2
		Number of Adults	0.0620852	0.118674	0.273692	0.600866
		Number of Adults2	-0.000189019	0.00142476	0.0176006	0.894457
		Number of Chicks	-0.160775	0.315423	0.259806	0.610253
		Number of Chicks2	0.00448932	0.00594766	0.569728	0.450367
		Number of Adults:Number of Chicks	0.000488213	0.00537564	0.00824817	0.927636
	m65	Intercept	6.90769	2.20962	9.77305	0.00177089	0.2855	115.6
		Number of Adults	0.0673497	0.10724	0.394421	0.529985
		Number of Adults2	-0.000234523	0.0014119	0.0275907	0.868075
		Number of Chicks	-0.141225	0.157035	0.808774	0.368483
		Number of Chicks2	0.004378	0.00469986	0.867724	0.351586
		Number of Adults2:Number of Chicks2	-5.87214e-08	4.06283e-06	0.000208899	0.988468
	m66	Intercept	6.09597	1.86163	10.7225	0.00105839	0.2593	114.9
		Number of Adults	0.0733932	0.102585	0.511847	0.47434
		Number of Adults2	-0.000100247	0.00129306	0.00601038	0.938205
		Number of Chicks2	0.00043413	0.00321425	0.0182423	0.892561
		Number of Adults2:Number of Chicks2	-1.73136e-06	2.94561e-06	0.345479	0.556684
	m67	Intercept	6.91616	1.9321	12.8136	<0.001	0.2855	114.8
		Number of Adults	0.0670469	0.103998	0.415627	0.519127
		Number of Adults2	-0.000232177	0.00141554	0.0269028	0.869715
		Number of Chicks	-0.141575	0.145893	0.941675	0.331847
		Number of Chicks2	0.00433492	0.00489558	0.784068	0.3759

## Sheet: Supplementary file 1E
Response Variable	Model ID	Independent Variables	Estimate	Standard Error	﻿Wald	P	R2	QIC
Speed while Travelling (m/s)	m13	Intercept	0.143374	0.0312463	21.0546	<0.001	0.2276	5
		Number of Adults	0.00298517	0.00204997	2.12053	0.145336
		Number of Adults2	-2.77358e-05	2.95209e-05	0.882716	0.347459
		Number of Chicks	-0.00105124	0.00052886	3.95116	0.046839
	m14	Intercept	0.143499	0.0308022	21.7038	<0.001	0.1913	3.78
		Number of Adults	0.0023181	0.00194067	1.42679	0.232289
		Number of Adults2	-1.60661e-05	2.7282e-05	0.34679	0.555936
	m15	Intercept	0.176667	0.0173555	103.618	<0.001	0.2111	5.14
		Number of Adults	0.000889696	<0.001	5.31233	0.021175
		Number of Chicks	-0.000849909	<0.001	2.97701	0.0844554
	m16	Intercept	0.164459	0.0132669	153.666	<0.001	0.1852	4.07
		Number of Adults	0.00107839	<0.001	10.1124	0.00147276
	Testing Interactions
	m44	Intercept	0.134892	0.030804	19.176	<0.001	0.2404	5
		Number of Adults	0.0034254	0.00202309	2.86677	0.0904262
		Number of Adults2	-3.25076e-05	2.88803e-05	1.26697	0.260336
		Number of Adults:Number of Chicks	-3.66866e-05	1.59031e-05	5.32175	0.0210609
	m45	Intercept	0.127773	0.0268251	22.6879	<0.001	0.2575	4.4
		Number of Adults	0.00349662	0.00188789	3.43038	0.0640075
		Number of Adults2	-3.05332e-05	2.81987e-05	1.17243	0.278902
		Number of Adults:Number of Chicks	4.09713e-05	5.20647e-05	0.619259	0.431323
		Number of Adults2:Number of Chicks	-2.1388e-06	1.33933e-06	2.55017	0.110283
	m46	Intercept	0.130565	0.0292708	19.8968	<0.001	0.2531	3.58
		Number of Adults	0.00355093	0.00188537	3.54726	0.0596439
		Number of Adults2	-3.28238e-05	2.67027e-05	1.51101	0.218985
		Number of Adults2:Number of Chicks	-1.09177e-06	3.92209e-07	7.74865	0.00537527
	m47	Intercept	0.119865	0.0274675	19.0436	<0.001	0.2502	5.65
		Number of Adults	0.00397207	0.0017883	4.93344	0.0263418
		Number of Adults2	-3.68659e-05	2.63194e-05	1.962	0.1613
		Number of Chicks	0.00223884	0.00186995	1.43347	0.231199
		Number of Adults:Number of Chicks	-0.000101867	5.62173e-05	3.28346	0.0699813
	m48	Intercept	0.149753	0.0452203	10.9669	0.00092756	0.2628	5.58
		Number of Adults	0.00239959	0.00266701	0.809515	0.368264
		Number of Adults2	-1.77606e-05	3.63092e-05	0.239265	0.624737
		Number of Chicks	-0.00495482	0.00633712	0.611326	0.434289
		Number of Adults:Number of Chicks	0.000308221	0.000352199	0.765856	0.381502
		Number of Adults2:Number of Chicks	-5.52629e-06	4.65058e-06	1.41206	0.234714
	m49	Intercept	0.125676	0.026122	23.1467	<0.001	0.2559	4.38
		Number of Adults	0.00364129	0.00177583	4.20445	0.0403181
		Number of Adults2	-3.256e-05	2.65377e-05	1.50536	0.219848
		Number of Chicks	0.000602734	0.000938799	0.412198	0.520856
		Number of Adults2:Number of Chicks	-1.51049e-06	7.23455e-07	4.35926	0.0368082
	m50	Intercept	0.174405	0.015628	124.541	<0.001	0.2185	5.27
		Number of Adults	0.000953417	0.000354886	7.21751	0.00721956
		Number of Adults:Number of Chicks	-2.8412e-05	1.55472e-05	3.33966	0.0676286
	m51	Intercept	0.167841	0.0207136	65.6574	<0.001	0.2232	6.3
		Number of Adults	0.00109863	0.000470407	5.45455	0.0195175
		Number of Chicks	0.00151049	0.00219148	0.475071	0.490664
		Number of Adults:Number of Chicks	-7.16393e-05	6.78463e-05	1.11494	0.291012
	m68	Intercept	0.12396	0.0430047	8.30869	0.00394558	0.2505	7.026
		Number of Adults	0.00382566	0.00222125	2.96633	0.0850148
		Number of Adults2	-3.56e-05	2.92e-05	1.4855	0.222915
		Number of Chicks	0.00121411	0.00844069	0.0206902	0.885626
		Number of Chicks2	3.32e-05	0.000270264	0.0150688	0.902301
		Number of Adults:Number of Chicks	-7.6e-05	0.000232466	0.106913	0.743686
		Number of Adults2:Number of Chicks2	-2.46e-08	2.31e-07	0.0112963	0.915357
	m69	Intercept	0.121327	0.0298744	16.4937	<0.001	0.2504	6.548
		Number of Adults	0.00393516	0.00182442	4.65237	0.0310108
		Number of Adults2	-3.67e-05	2.65e-05	1.91799	0.166079
		Number of Chicks	0.00198187	0.00261221	0.575615	0.448036
		Number of Chicks2	7.78e-06	6.03e-05	0.0166272	0.8974
		Number of Adults:Number of Chicks	-9.93e-05	5.58e-05	3.16684	0.0751476
	m70	Intercept	0.133611	0.0286196	21.7949	<0.001	0.2495	5.894
		Number of Adults	0.00343042	0.00185442	3.422	0.0643332
		Number of Adults2	-3.18e-05	2.72e-05	1.36825	0.242113
		Number of Chicks	-0.00133873	0.00153094	0.764655	0.381876
		Number of Chicks2	0.000110892	8.24e-05	1.81113	0.178373
		Number of Adults2:Number of Chicks2	-9.78e-08	5.63e-08	3.01306	0.0825961
	m71	Intercept	0.125916	0.0274296	21.0729	<0.001	0.2426	4.859
		Number of Adults	0.0034877	0.00184063	3.59044	0.0581128
		Number of Adults2	-3.05e-05	2.69e-05	1.28619	0.256752
		Number of Chicks2	7.35e-05	6.51e-05	1.2756	0.258719
		Number of Adults2:Number of Chicks2	-1.14e-07	6.26e-08	3.29687	0.069412
	m72	Intercept	0.14771	0.0330334	19.9947	<0.001	0.2312	6.026
		Number of Adults	0.00292633	0.00206299	2.01212	0.156047
		Number of Adults2	-2.79e-05	2.94e-05	0.900947	0.342528
		Number of Chicks	-0.00192187	0.00164312	1.36808	0.242142
		Number of Chicks2	3.92e-05	6.16e-05	0.404055	0.525003

## Sheet: Supplementary file 1F
Response Variable	Model ID	Independent Variables	Estimate	Standard Error	﻿Wald	P	R2	QIC
Number of chicks	m73	Intercept	-6.4914	7.0424	0.85	0.357	0.1229	1295
		Number of Adults	1.0465	0.48542	4.65	0.031
		Number of Adults2	-0.01586	0.00727	4.76	0.029
	m74	Intercept	11.1833	3.1398	12.69	<0.001	0.01271	1457
		Number of Adults	-0.0724	0.0905	0.64	0.4237
